# Supplementary material for: The impact of species, respiration type, growth phase and genetic inventory on absolute metal content of intact bacterial cells
Source: Royal Society of Chemistry journal article supplement (doi:10.1039/c9mt00009g), 2019-03-01
Supplement: c9mt00009g1.xlsx [file c9mt00009g1.xlsx]

## Sheet: Sheet1
Supplementary Table 1: Operating conditions of the Agilent 8800 ICP-MS QqQ
Scan type	MS/MS
RF power	1550
Sampler depth (mm)	8
Carrier gas flow (L/min)	1.03
Nebulizer pump (rps)	0.1
S/C Temp (C)	2
Dilution gas (L/min)	0.2
Extract 1 (V)	0
Extract 2 (V)	−140
Q1 Entrance (V)	0
Q1 Exit (V)	-2
Wait time offset (msec)	2
Cell focus (V)	-3
Cell entrance (V)	−50
Cell exit (V)	−60
Deflect (V)	-0.6
Plate bias (V)	−60
Gas mode	H2
H2 flow rate (mL/min)	3
OctP bias (V)	-18
Energy discrimination (V)	5
