# Supplementary material for: The impact of species, respiration type, growth phase and genetic inventory on absolute metal content of intact bacterial cells
Source: Royal Society of Chemistry journal article supplement (doi:10.1039/c9mt00009g), 2019-03-01
Supplement: c9mt00009g2.xlsx [file c9mt00009g2.xlsx]

## Sheet: Sheet1
Supplementary Table 2. Metal ions per cell as determined by ICP-MS (Agilent 8800 QqQ).
	Metal ions per cell
	Fe		Co		Ni		Mo
	mean	SD	mean	SD	mean	SD	mean	SD
E. coli (aerobic MM medium)	9.73775e+06	70429.8	163929	71823.3	17624.8	8887.7	20651.6	1528.56
E.coli (anaerobic MM medium)	7.66205e+06	1.36155e+06	229540	16344.9	12885.3	2240.6	49956.8	1212.43
E. coli (aerobic LB medium)	2.06561e+06	100352	3303.36	278.02	14100.1	835.061	14750.8	258.23
Ca. Kuenenia stuttgartiensis	16682500	3.45671e+06	135603	11178.6	157097	25911.6	59658.3	11087.7
D. mccartyiCBDB1	678233	224118	14821.8	6130.2	44616.3	4445.35	32507.2	14680.4
G. sulfurreducens	3.91435e+06	296992	14173.7	1603.03	17951.9	544.734	25333.5	4473.83
G. metallireducens (nitrate)	13939400	5.20888e+06	61002	19142.8	40015.9	17893.4	43464.6	30247
G. metallireducens (Fe-citrate)	121875000	44185700	21084.2	9125.93	71001.8	11941.7	17759.2	7596.24
D. vulgaris	9460000	203000	54400	5630	30000	9120	334000	71200
The values are the mean of three independent measurements
